# Supplementary material
Source: ML conference proceedings conference paper supplement (https://openreview.net/forum?id=rrlMyPUs9gc)
Supplement: supplementary_material [file attachment]

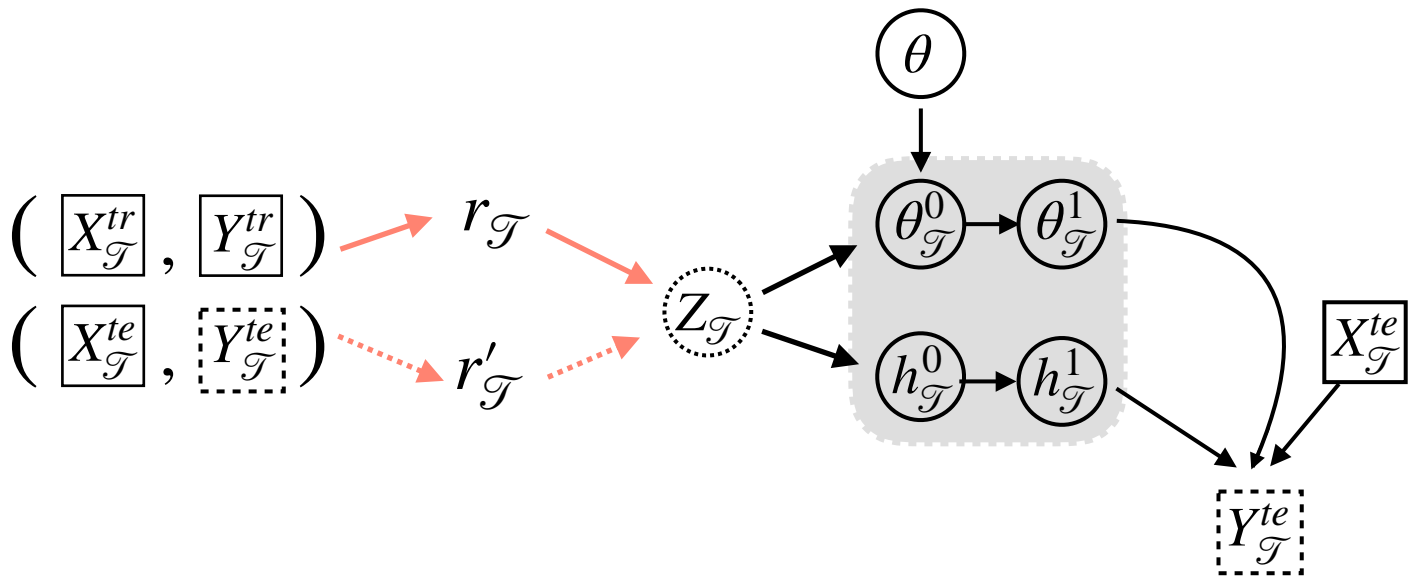

$$\Theta_{\mathcal{J}}^0 = [\theta_{\mathcal{J}}^0, h_{\mathcal{J}}^0]$$

$$\Theta_{\mathcal{J}}^1 = [\theta_{\mathcal{J}}^1, h_{\mathcal{J}}^1]$$

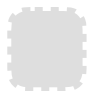

fine-tuning

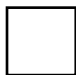

observation

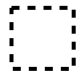

only observed in meta-training

..... path to the posterior in meta-training

..... path to the prior in meta-testing
