# Supplementary material
Source: ML conference proceedings conference paper supplement (https://openreview.net/forum?id=rrlMyPUs9gc)

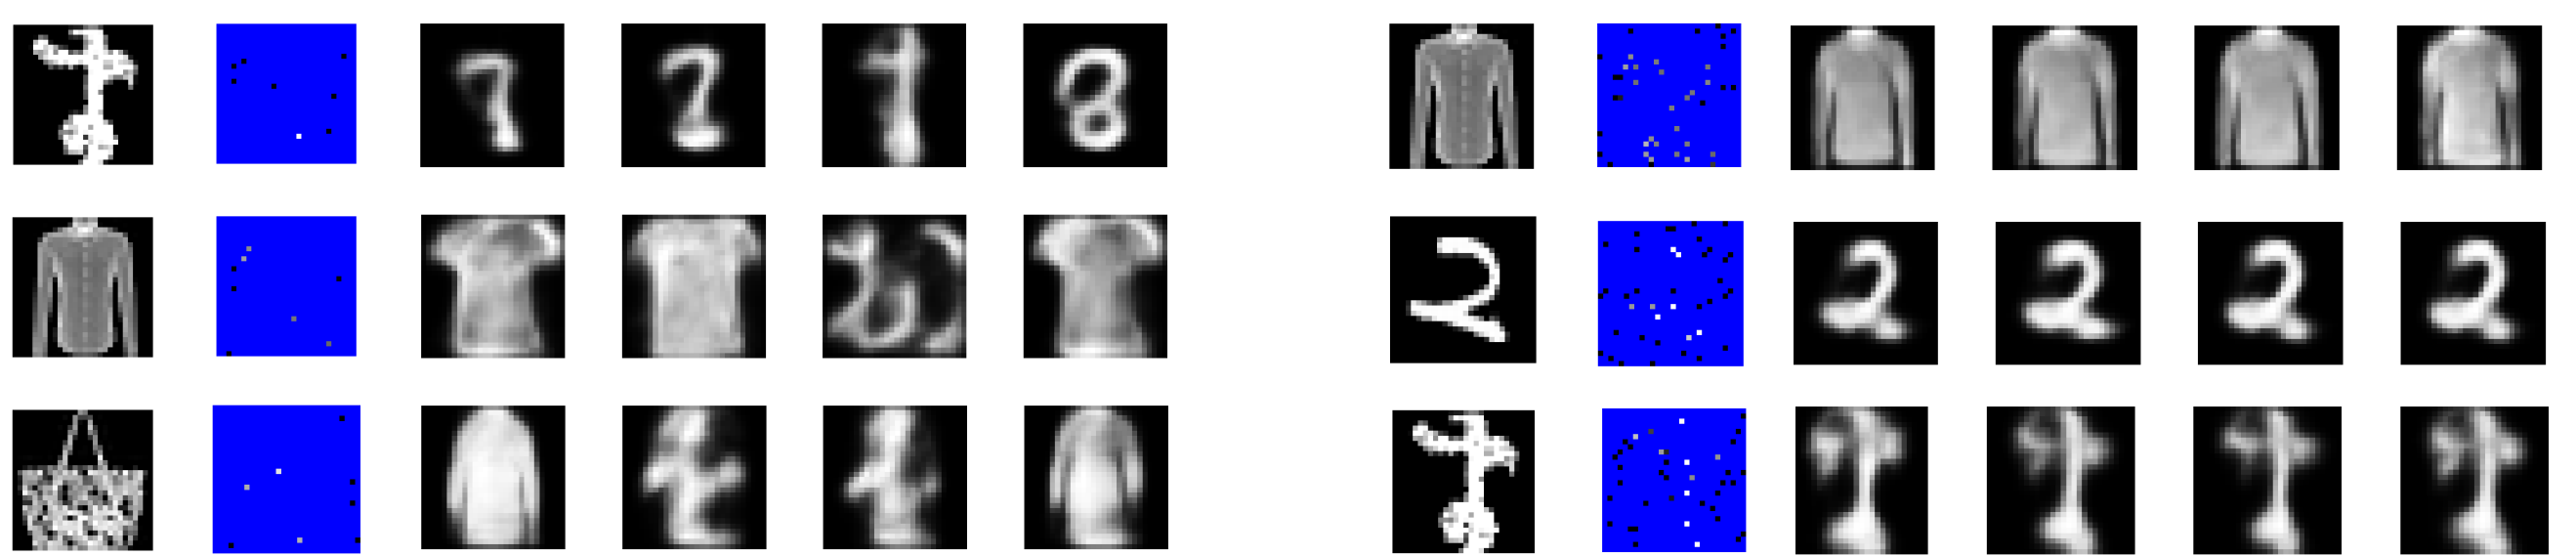

Supplement: supplementary_material [file attachment]

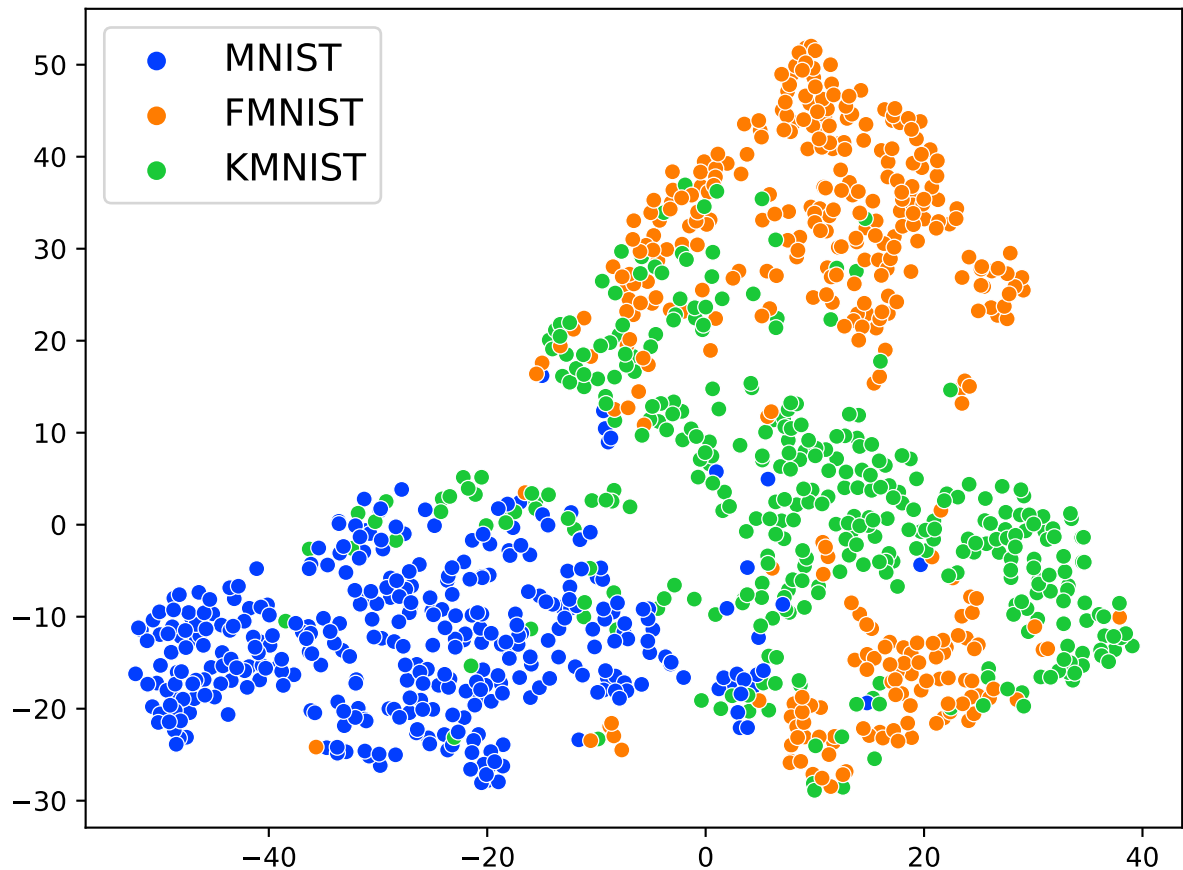

Supplement: supplementary_material [file attachment]

# cubic curve

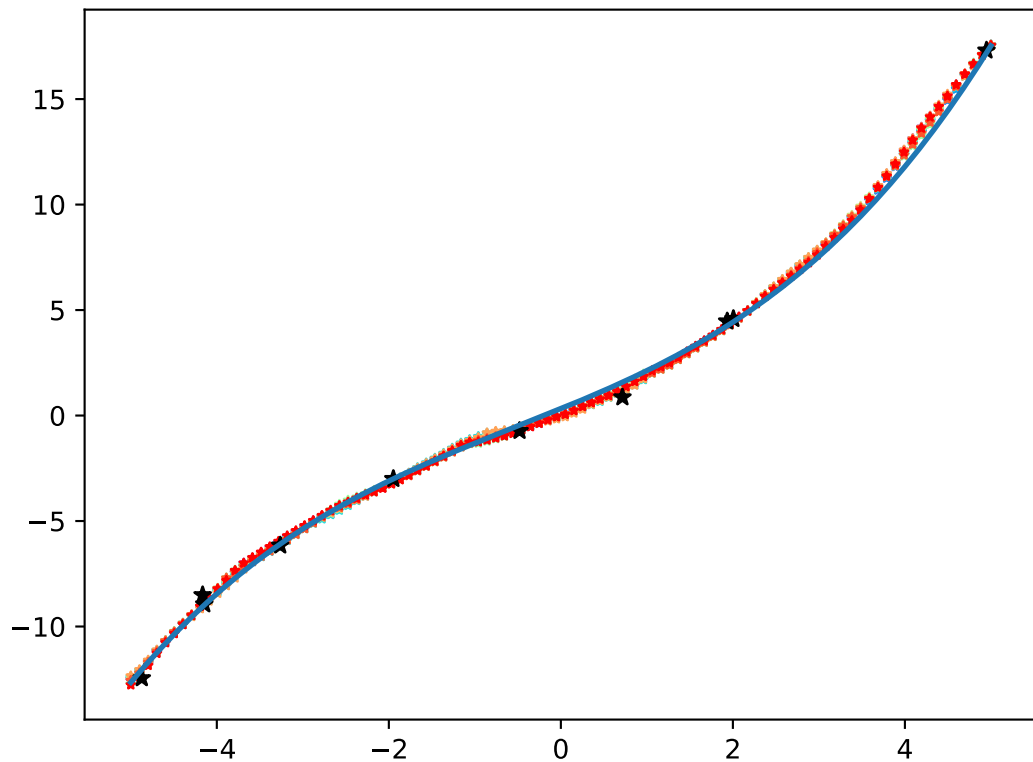

Supplement: supplementary_material [file attachment]

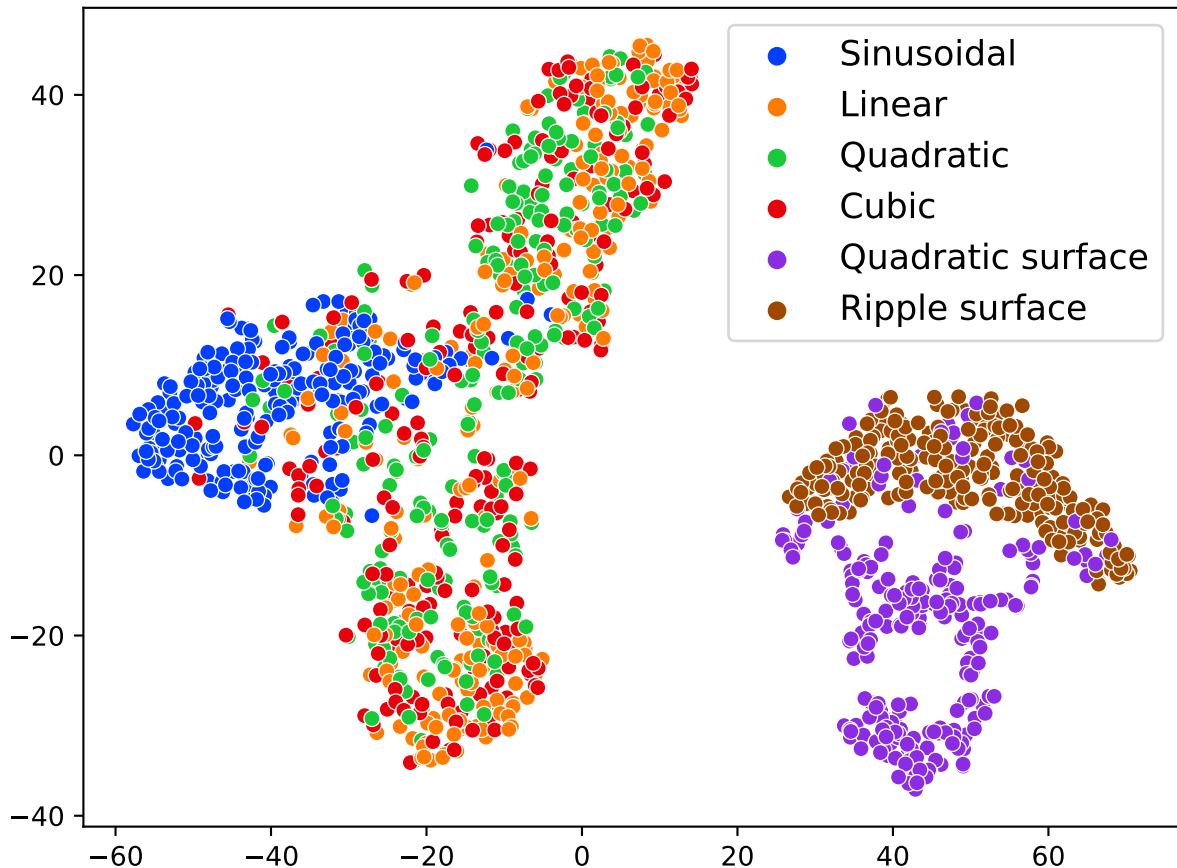

Supplement: supplementary_material [file attachment]

ELK ISLAND NAT PARK ALTA, CA, 2009

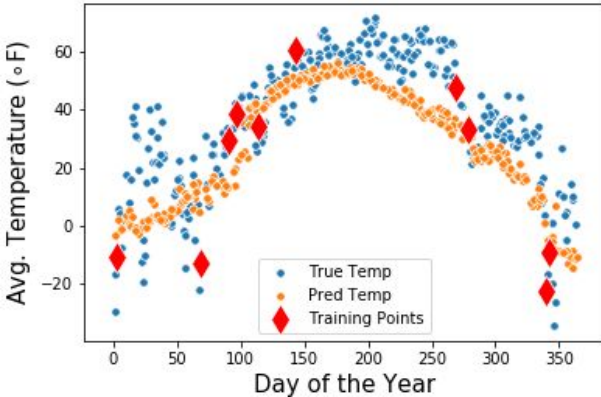

SCHLESWIG, GM, 1969

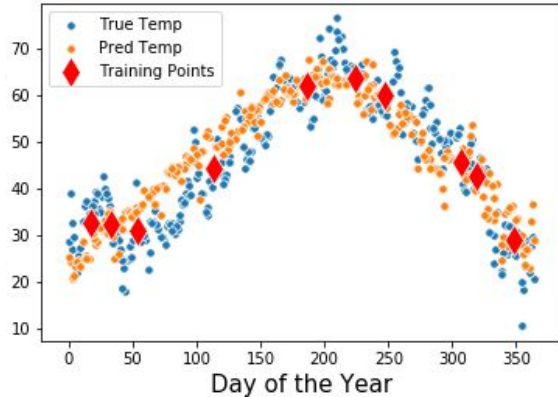

LONGYEAR, SV, 1989

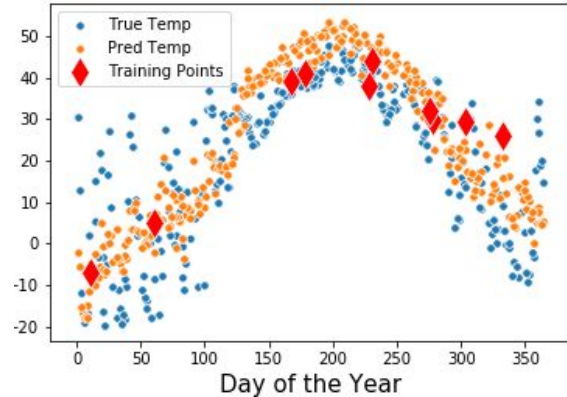

Supplement: supplementary_material [file attachment]

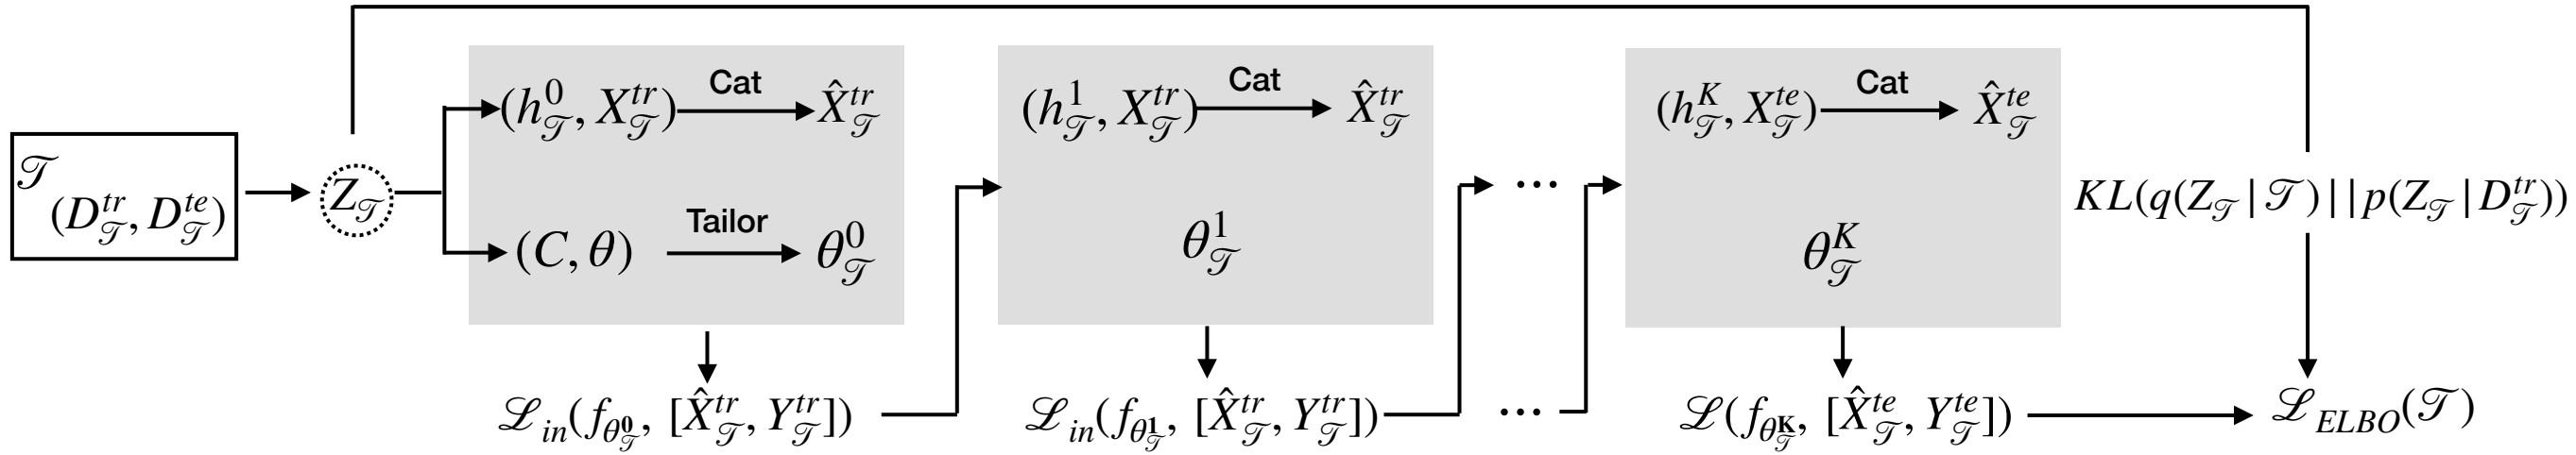

Supplement: supplementary_material [file attachment]

(a)

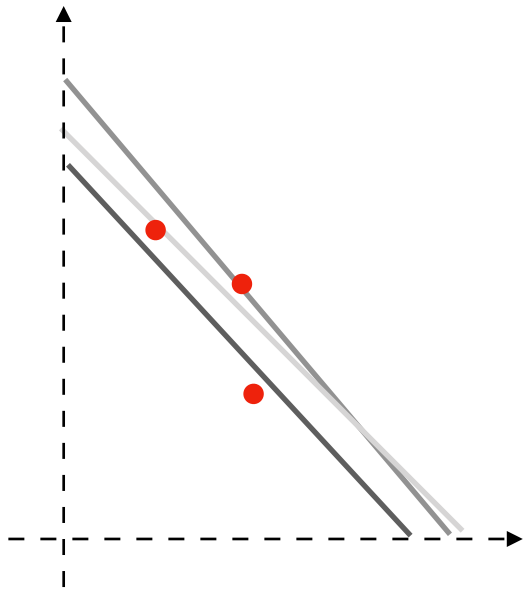

(b)

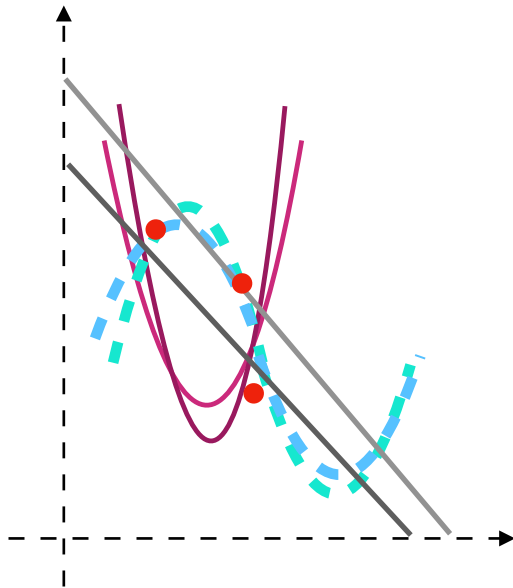

Supplement: supplementary_material [file attachment]

# straight line

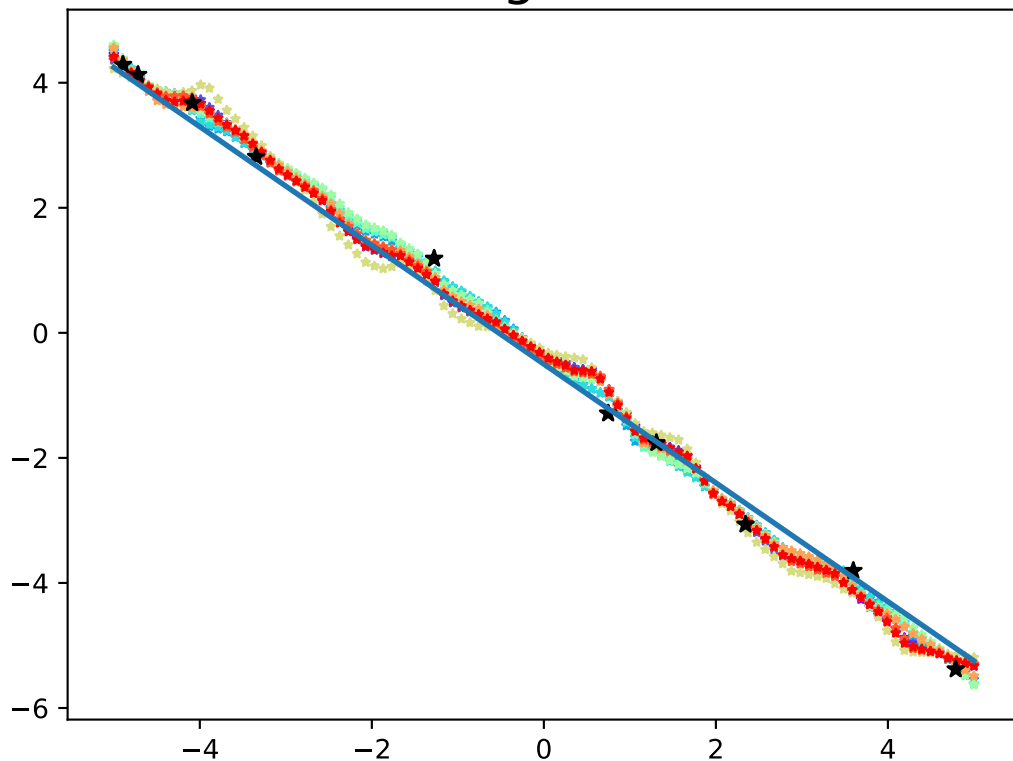

Supplement: supplementary_material [file attachment]

sin curve

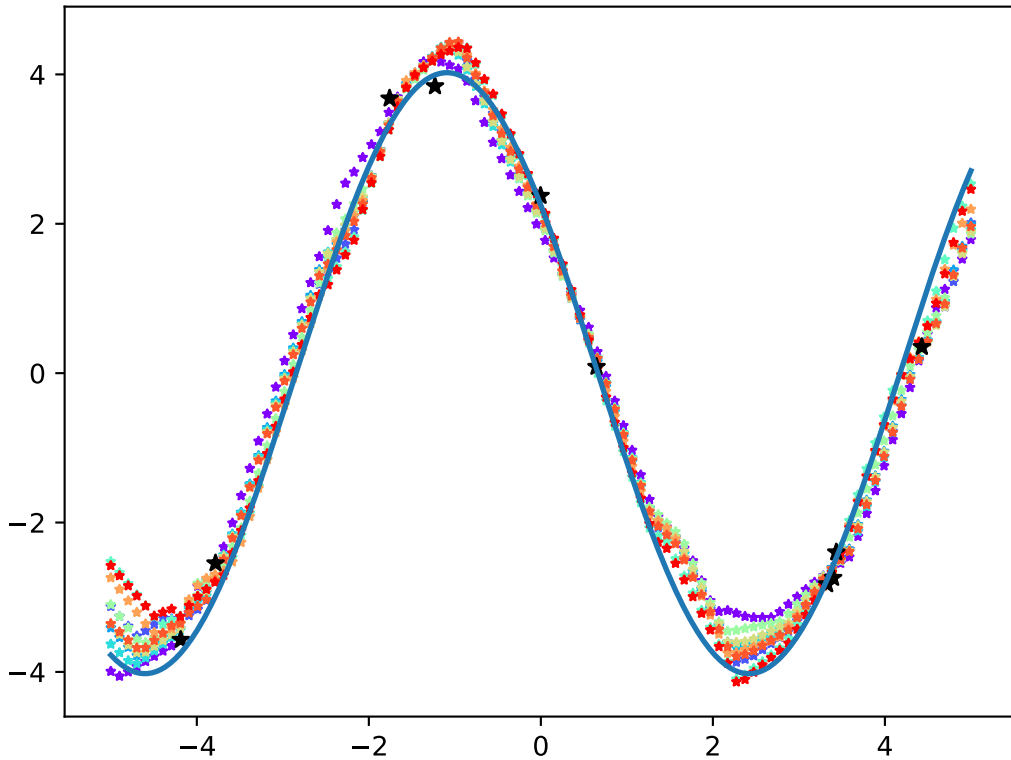

Supplement: supplementary_material [file attachment]

# quadratic curve

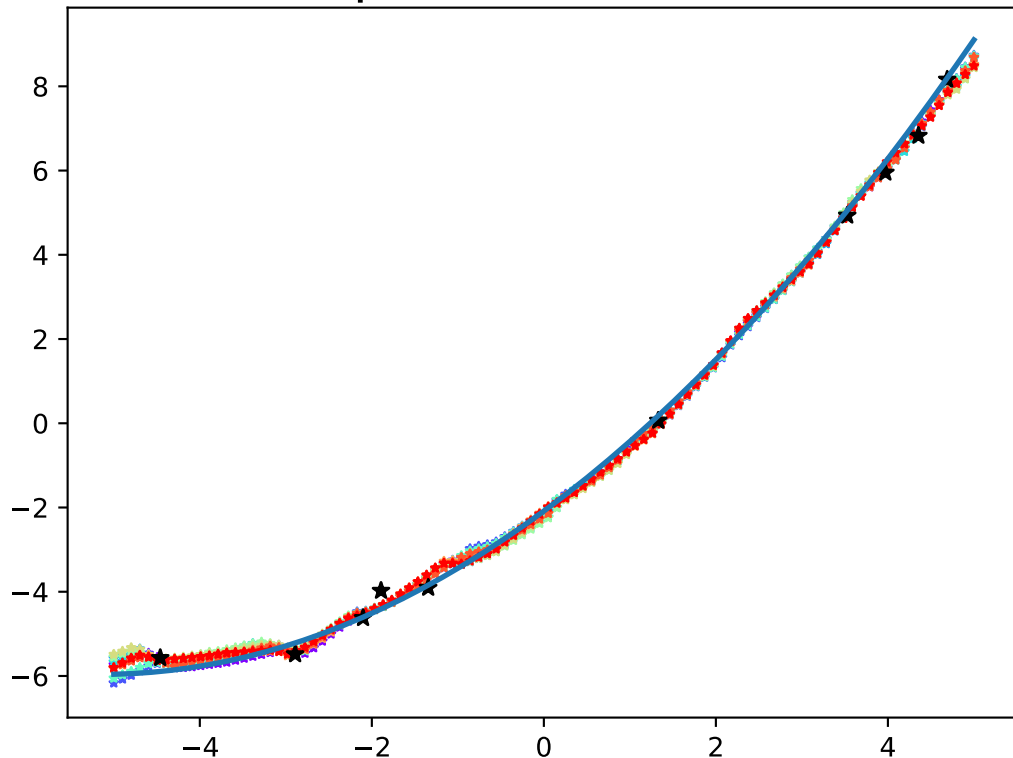

Supplement: supplementary_material [file attachment]

sin curve

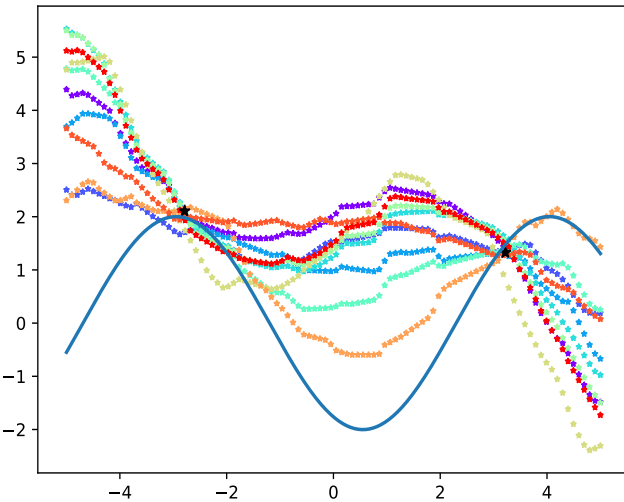

(a)

cubic curve

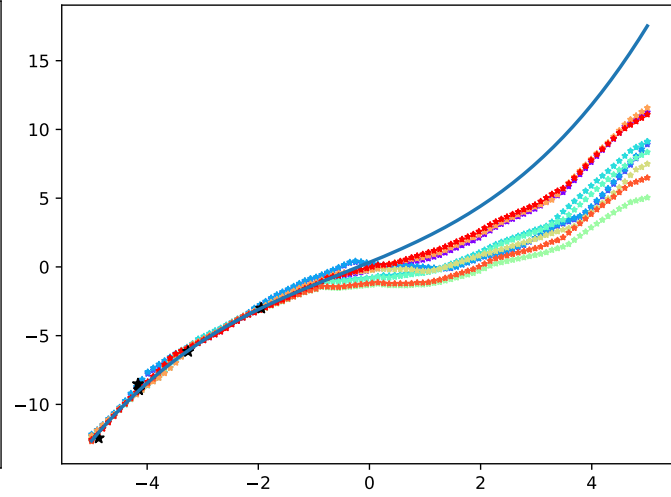

(b)

sin curve

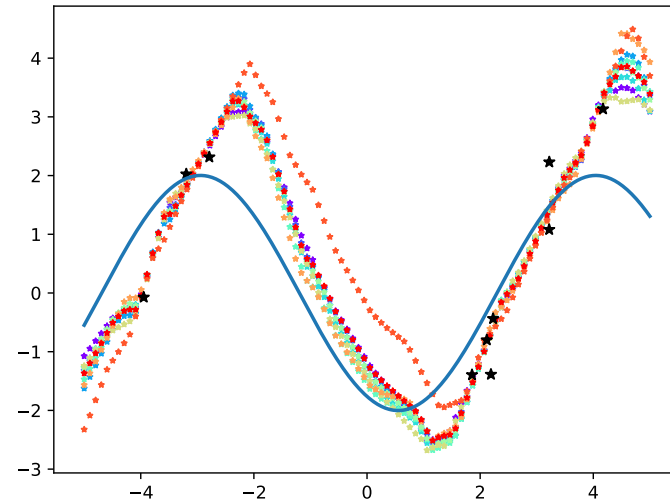

(c)

quadratic curve

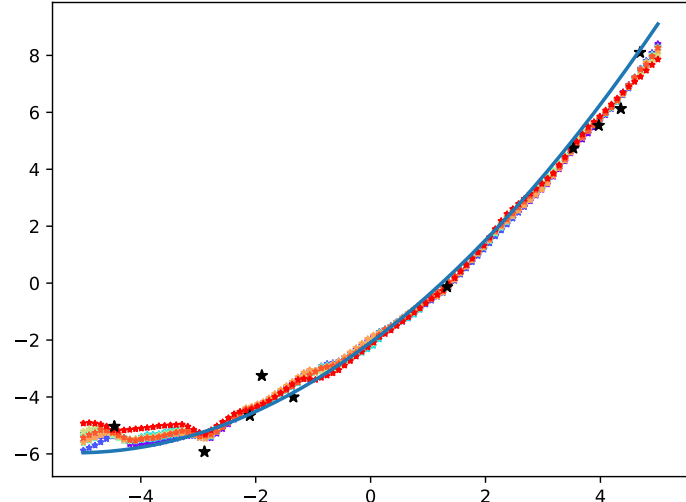

(d)

Supplement: supplementary_material [file attachment]
